# Supplementary material
Source: Springer Nature journal article supplement (https://www.springermedizin.de/resource/supplementary/12877_2011_750_MOESM1_ESM.pdf/9440270)

**Socio-economic factors**

**Social support**

**Psychological distress**

**Somatic health problems**

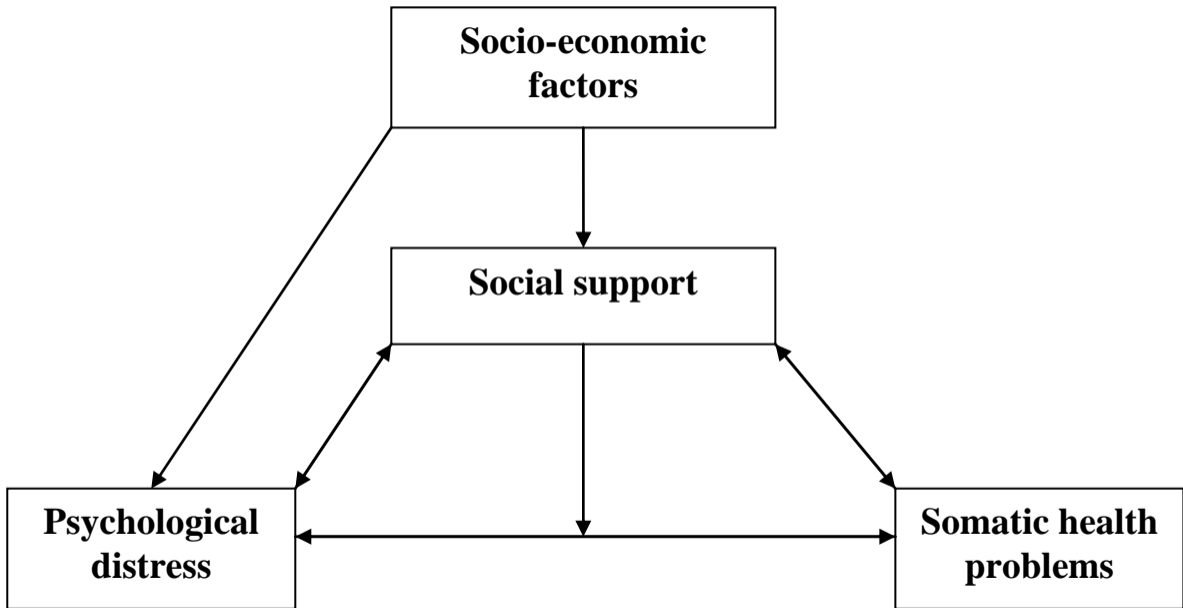

Supplement: MOESM1 [file 9440270]
